# Supplementary material for: Synergy of strong/weak interface adhesion forces and Li2S additive enabling high performance full anode-free lithium–metal batteries
Source: Royal Society of Chemistry journal article supplement (doi:10.1039/d3ta04883g), 2023-01-01
Supplement: d3ta04883g1.pdf [file d3ta04883g1.pdf]

1 **Supporting Information for**  
2 **Synergy of strong/weak interface adhesion forces and Li<sub>2</sub>S**  
3 **additive enabling high performance full anode-free lithium-**  
4 **metal batteries**

5 Zejian Fang<sup>ab</sup>, Shukai Ding<sup>\*a</sup>, Gaohui Du<sup>\*a</sup>, Yong Zhu<sup>c</sup>, Christophe A. Serra<sup>d</sup>, Bingshe Xu<sup>a</sup>, Qingmei  
6 Su<sup>a</sup>, Guoquan Suo<sup>\*b</sup>, Wei Wang<sup>\*c</sup>

7 <sup>1</sup> Materials Institute of Atomic and Molecular Science, Shaanxi University of Science and Technology,  
8 Xi'an 710021, China

9 <sup>2</sup> School of Materials Science & Engineering, Shaanxi University of Science and Technology, Xi'an  
10 710021, China.

11 <sup>3</sup> School of Metallurgical and Ecological Engineering, University of Science and Technology Beijing,  
12 Beijing 100083, China

13 <sup>4</sup> Université de Strasbourg, CNRS, ICS UPR 22, F-67000 Strasbourg, France

14 **\*Corresponding author:**

15 Shukai Ding, E-mail: dingshukai@sust.edu.cn

16 Gaohui Du, E-mail: dugaohui@sust.edu.cn

17 Guoquan Suo, E-mail: suoguoquan@sust.edu.cn

18 Wei Wang, E-mail: wwang@ustb.edu.cn

19

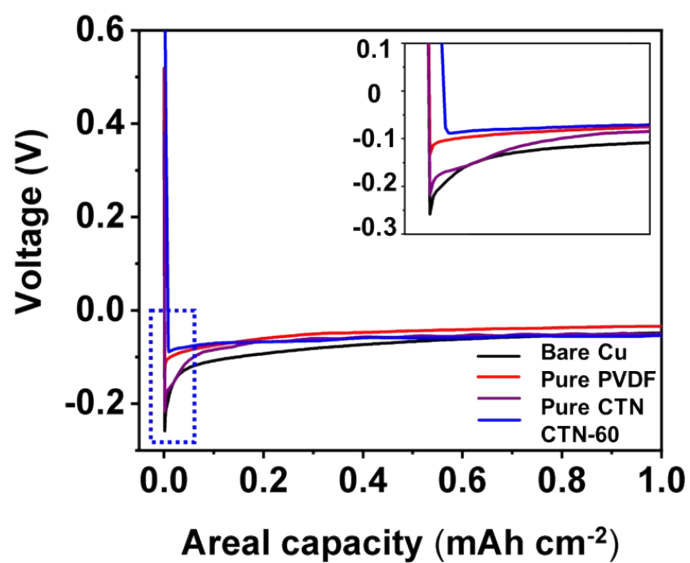

21 Figure S1 Initial voltage versus areal capacity profiles in half-cell of bare Cu, pure PVDF, pure CTN,  
22 and CTN-60 at the current density of 0.5 mA cm<sup>-2</sup>.

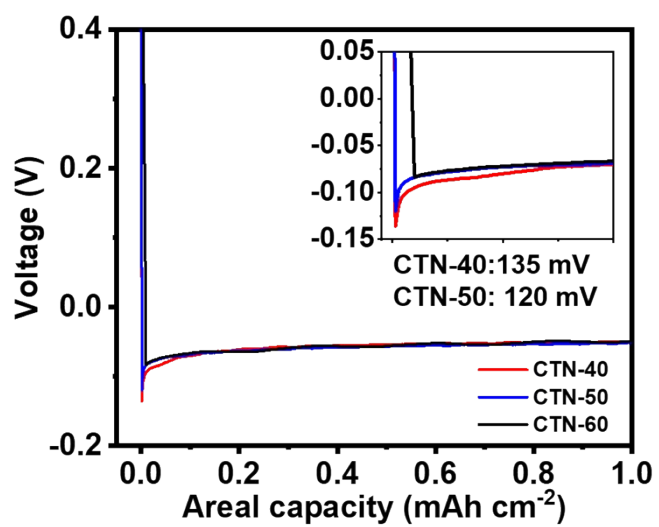

24

25 Figure S2 Initial voltage versus areal capacity profiles in half-cell of CTN-40, CTN-50, and CTN-60  
26 at the current density of 0.5 mA cm<sup>-2</sup>.

27

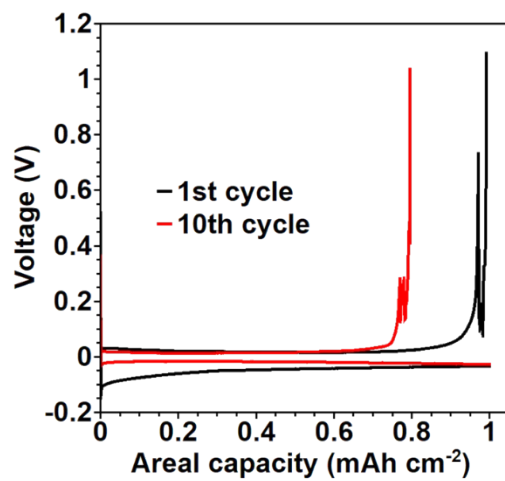

28  
29  
30

Figure S3 Voltage profiles in the half cell of pure PVDF.

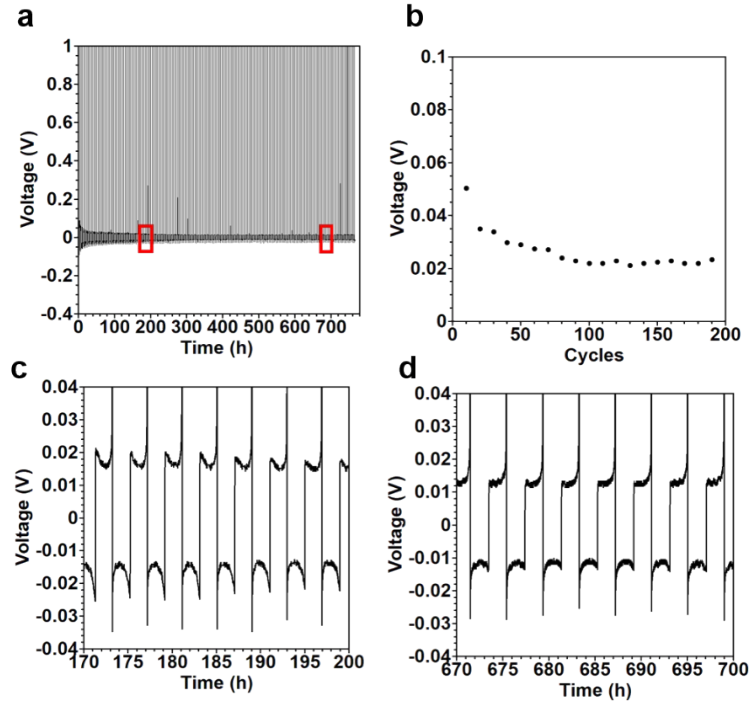

31

32 Figure S4 (a) Voltage versus cycle number curve of CTN-60 at  $0.5 \text{ mA cm}^{-2}$  with an areal capacity of  
 33  $1 \text{ mAh cm}^{-2}$ , (b) voltage hysteresis versus cycle number, and (c, d) voltage profiles of selected cycles.

34

Table S1 Performance comparison of half-cell in literatures.

| <b>Current density (mA cm<sup>-2</sup>)</b> | <b>Capacity (mAh cm<sup>-2</sup>)</b> | <b>Cycles</b> | <b>Average coulombic efficiency (%)</b> | <b>Reference</b> |
|---------------------------------------------|---------------------------------------|---------------|-----------------------------------------|------------------|
| 0.5                                         | 1                                     | 200           | 96.08                                   | This work        |
| 5                                           | 0.5                                   | 30            | 98.83                                   | 1                |
| 1                                           | 0.5                                   | 200           | 98                                      | 2                |
| 5                                           | 0.5                                   | 100           | 90.2                                    | 3                |
| 1                                           | 1                                     | 200           | 97.7                                    | 4                |
| 1                                           | 1                                     | 130           | 97.3                                    | 5                |
| 0.2                                         | 1.5                                   | 40            | 98.1                                    | 6                |
| 1                                           | 1                                     | 100           | /                                       | 7                |
| 0.5                                         | 1                                     | 200           | 94.5                                    | 8                |
| 1                                           | 0.5                                   | 240           | 97.6                                    | 9                |
| 0.5                                         | 1                                     | 150           | 87                                      | 10               |
| 1                                           | 1                                     | 180           | 97                                      | 11               |
| 0.25                                        | 0.5                                   | 300           | 98.5                                    | 12               |

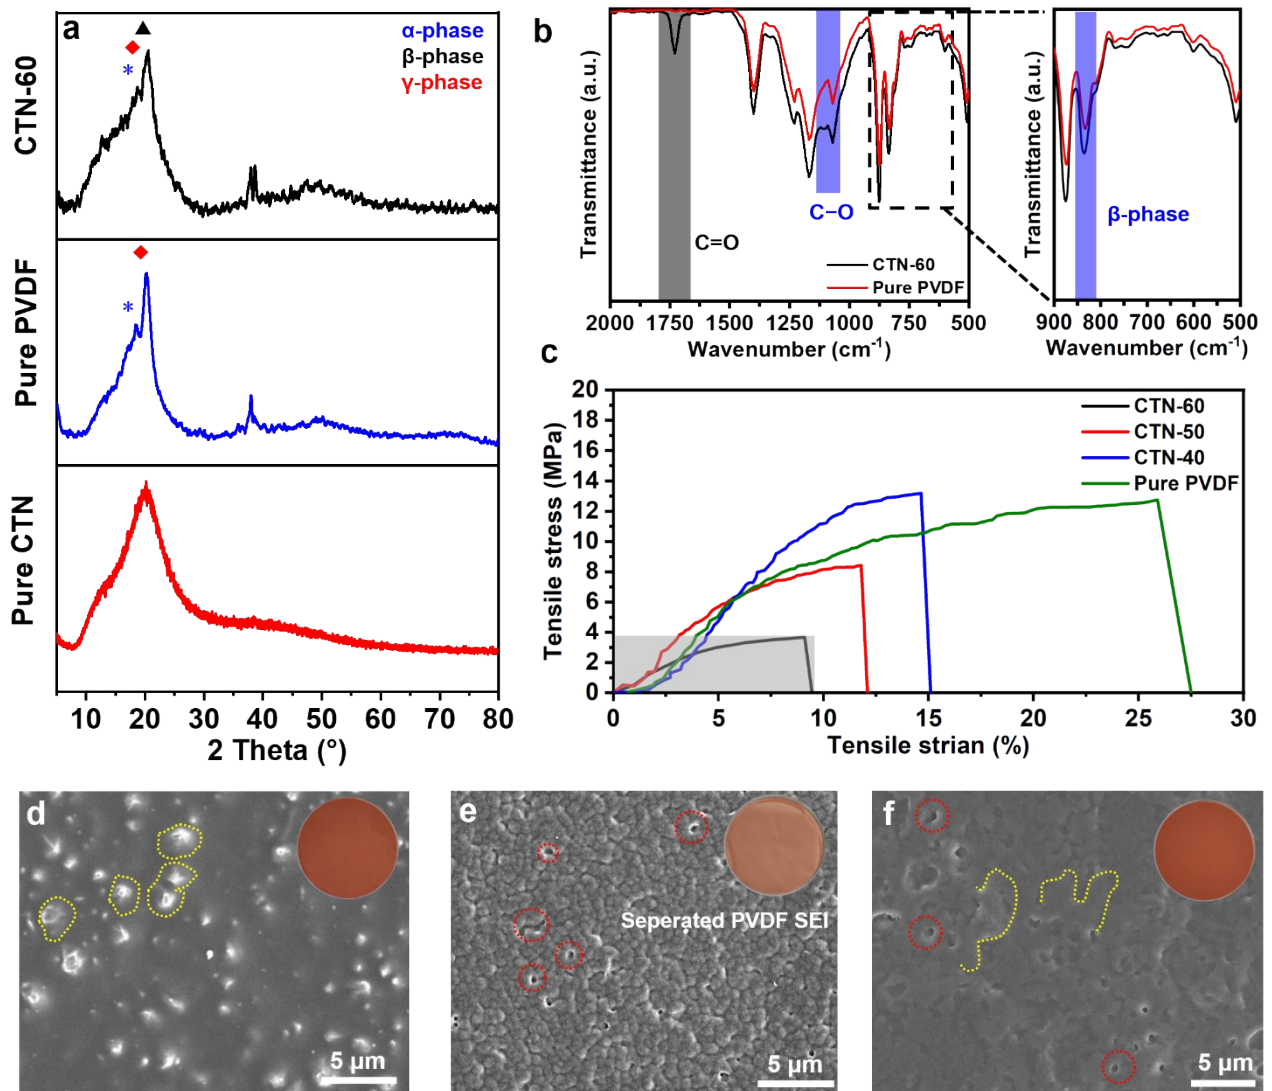

37

38 Figure S5 (a) XRD pattern for CTN-60, pure PVDF, and pure CTN, (b) FTIR spectra of pure PVDF  
 39 and CTN-60, (c) mechanical property of CTN-60, -50, -40, and pure PVDF, morphology (inset:  
 40 photographs) of (d) pure CTN, (e) pure PVDF, (f) CTN-60 characterized by SEM (yellow dotted line  
 41 representing the convex formed by aggregation of CTN or crystallizing of PVDF molecule, red dotted  
 42 circles representing the crack induced by phase segregation).

43

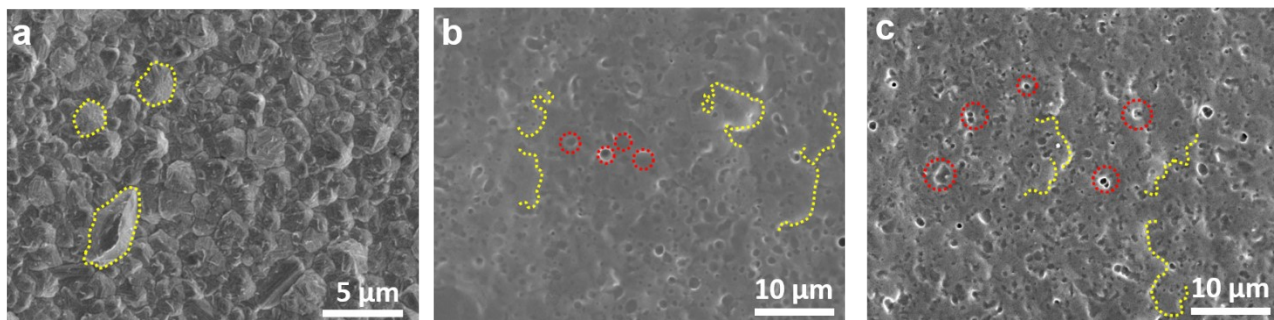

44

45 Figure S6 Morphology of (a) bare Cu, (b) CTN-50, and (c) CTN-40 characterized by SEM. (yellow  
46 dotted line representing the Cu convex in Figure a and imprinted Cu convex by SEI in Figures b and  
47 c, red dotted circles representing the crack induced by phase segregation).

48

49

50

51



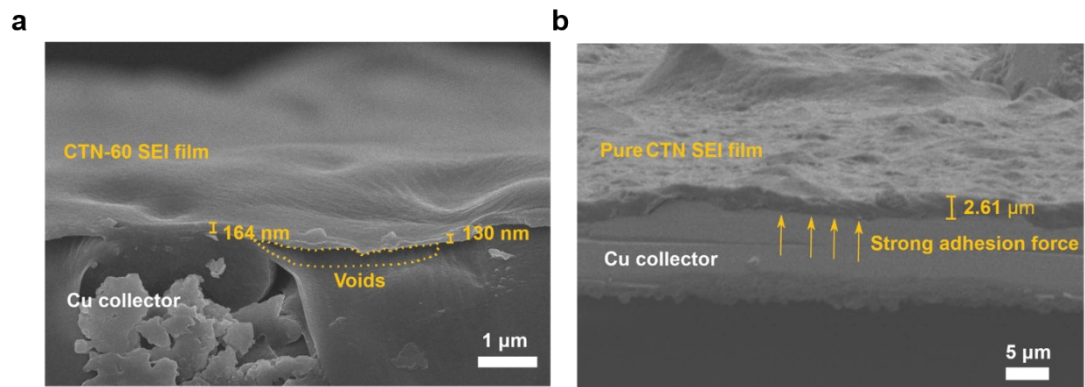

53

54 Figure S7 Cross-section of (a) Cu collector with CTN-60 and (b) Cu collector with pure CTN  
55 characterized by SEM.

56

**Weak adhesion force of PVDF's inert C-F bond**

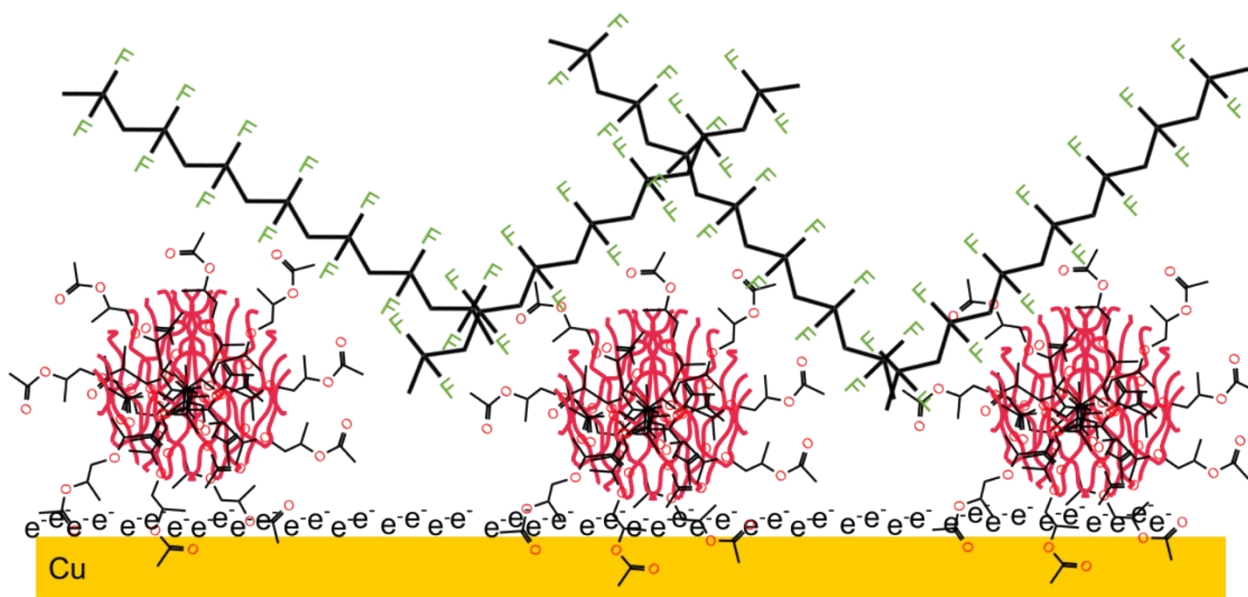

**Strong adhesion force from interaction of CTN's carbonyl group with Cu's surface electron**

Figure S8 Scheme of the mixed adhesion force of CTN-60 with Cu collector.

57

58

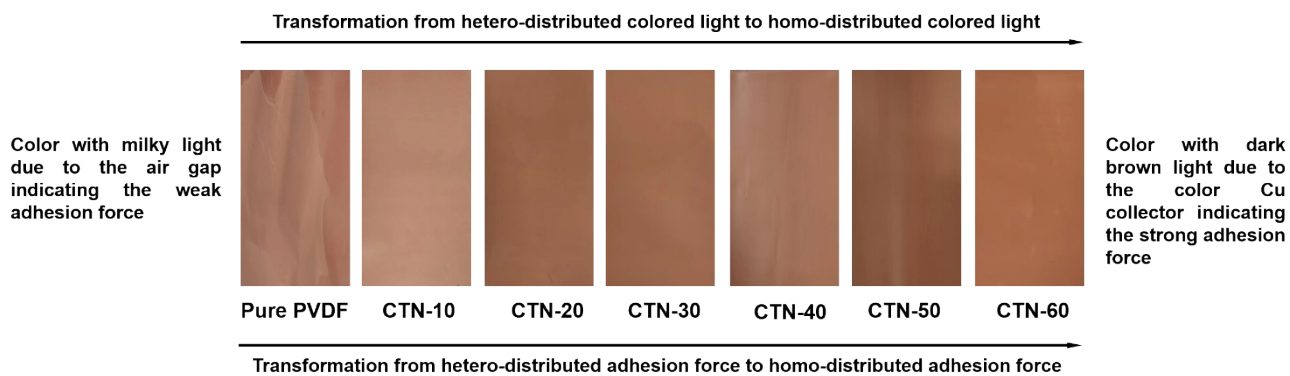

Figure S9 Transformation of visual state characterized by different SEIs photos

Transformation from separated state to bond state between Cu collector and CTN-based SEI

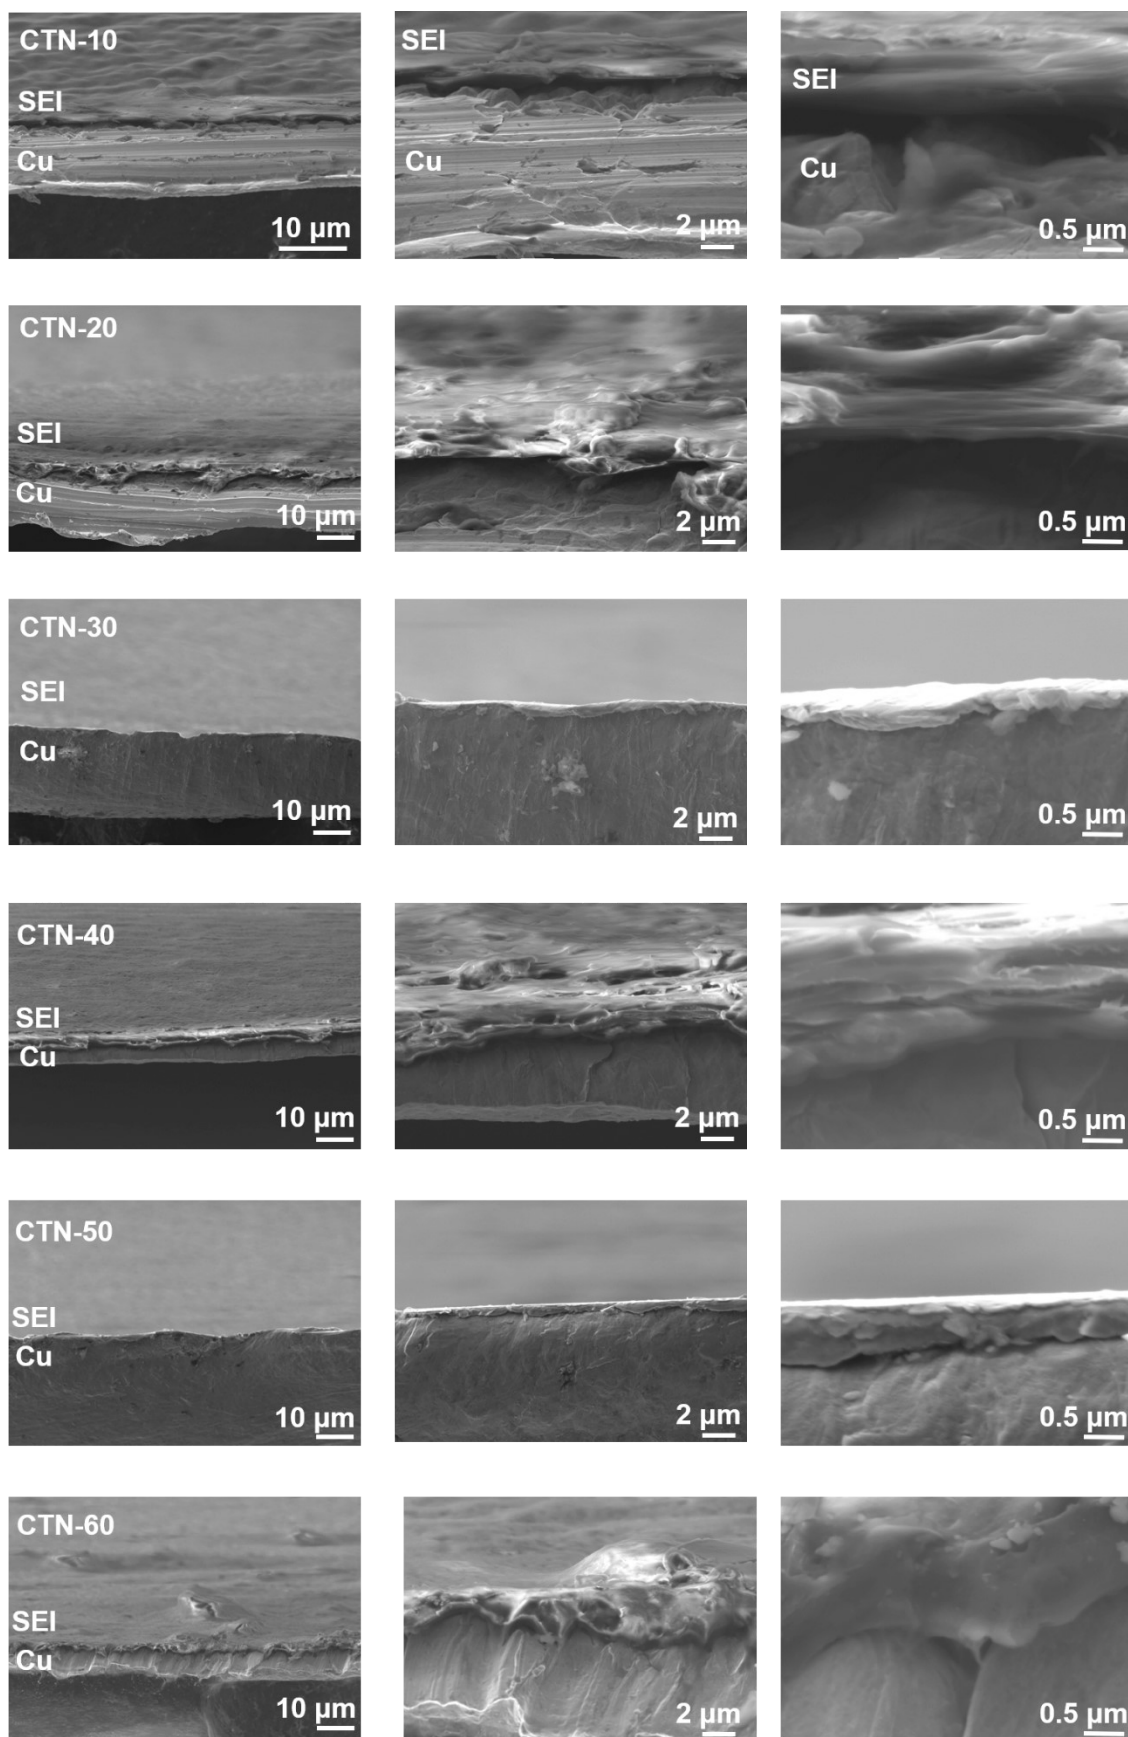

Figure S10 Transformation of different SEIs interfacial state characterized by SEM.

62

63

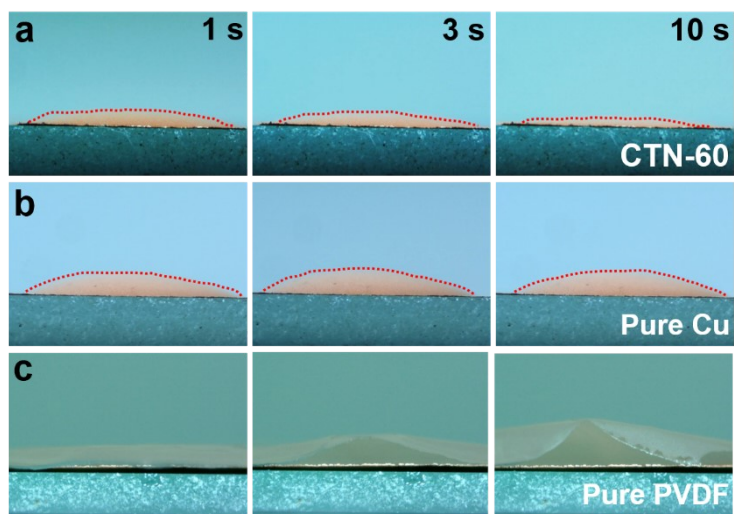

64

65 Figure S11 (a) Electrolyte wetting testing of (a) CTN-60, (b) bare Cu, and (c) pure PVDF.

66

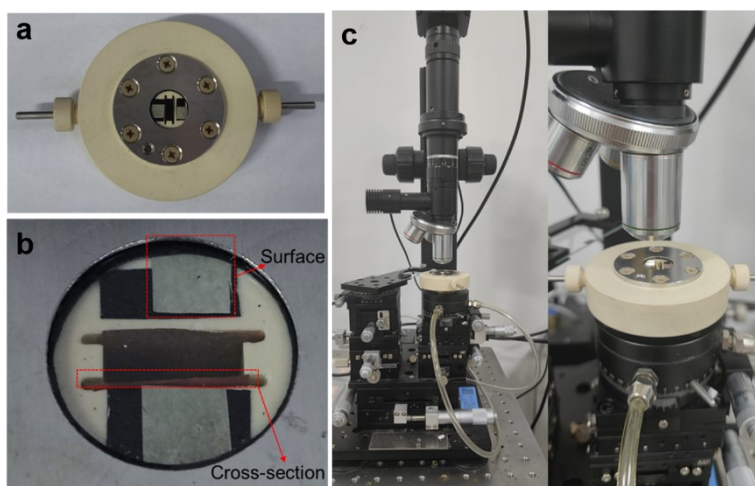

68  
69 Figure S12 (a) Sealed equipment with glass windows, (b) locations of the sample in sealed equipment  
70 for observation the morphology of surface and cross-section, and (c) optical microscope for  
71 observation.

72

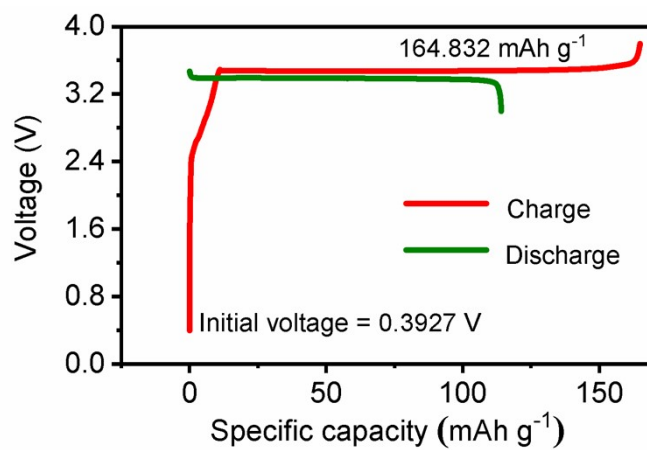

73

74

Figure S13 Initial charge and discharge curves of LiFePO<sub>4</sub> based full cell with CTN-60.

75

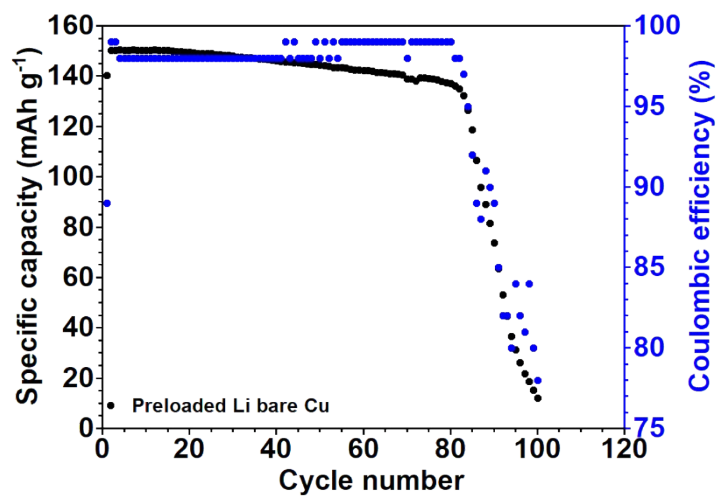

76  
77 Figure S14 Electrochemical performance of LiFePO<sub>4</sub> full cell with the preloaded Li bare Cu with 2  
78 mAh cm<sup>-2</sup>.  
79



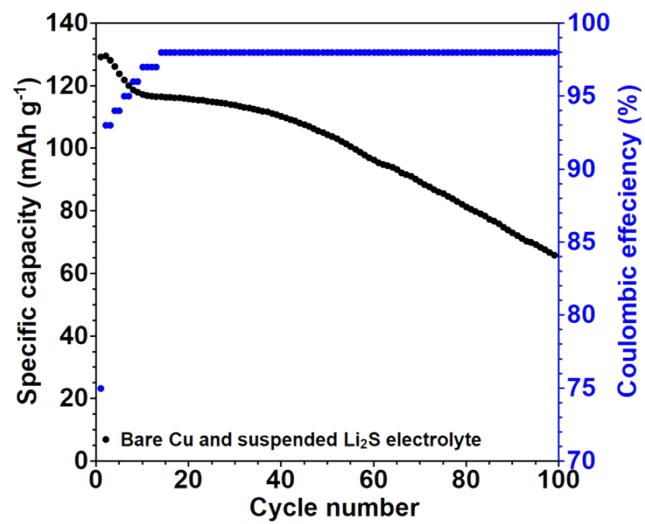

80 Figure S15 Electrochemical performance of LiFePO<sub>4</sub> full cell with the bare Cu and the suspended  
 81 Li<sub>2</sub>S electrolyte.

82

83

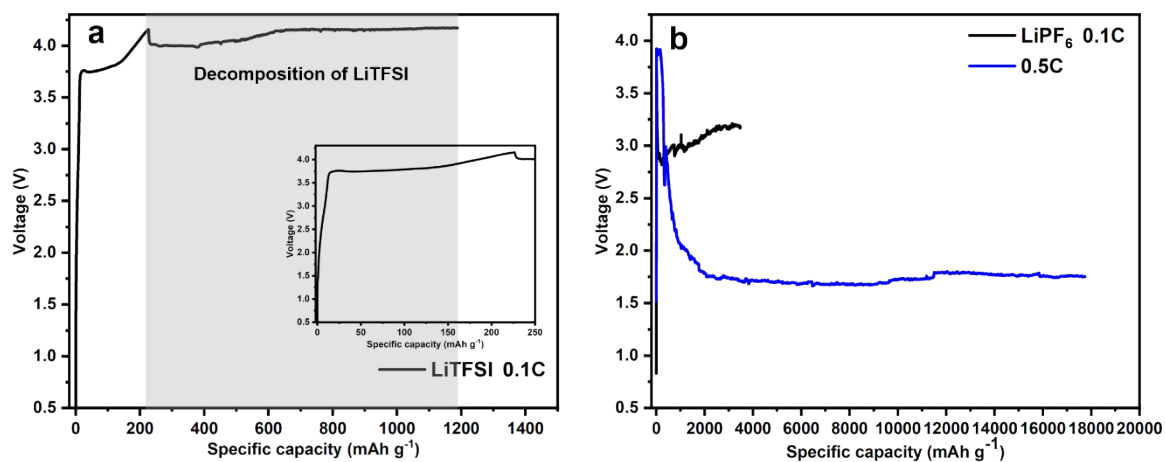

Figure S16 Voltage versus specific capacity curve of NCM 811 full cell with  $\text{Li}_2\text{S}$  (a) 1 M LiTFSI in DOL: DME = 1:1 Vol % with 2 %  $\text{LiNO}_3$  at current density of 0.1 C and (b) 1M  $\text{LiPF}_6$  in EC:DEC:EMC=1:1:1 Vol% at current density of 0.1 C and 0.5 C, respectively.

85

86

Table S2 Performance comparison of full-cell in literatures.

| Collector    | Cathode | Electrolyte                                                                  | Current rate                   | Cycles | Capacity retention (%) | Ref.      |
|--------------|---------|------------------------------------------------------------------------------|--------------------------------|--------|------------------------|-----------|
| Cu@CTN-60    | LFP     | 1 M LiTFSI + 2%LiNO <sub>3</sub> in DOL: DME (1:1, v/v) +2%Li <sub>2</sub> S | 2C (1.19 mA cm <sup>-2</sup> ) | 100    | 85.98%                 | This work |
| Cu@LiF-PVDF  | LFP     | 1 M LiTFSI + 2%LiNO <sub>3</sub> in DOL: DME (1:1, v/v)                      | 1C                             | 40     | ~18.5%                 | 3         |
| Cu Ag@PDA-GO | NCM     | 1 M LiPF <sub>6</sub> in EC/DEC (1:1 v/v) with 5% FEC                        | 0.5 mA cm <sup>-2</sup>        | 50     | 65.47%                 | 6         |
| Cu@MLG       | LFP     | 1 M LiTFSI + 2%LiNO <sub>3</sub> in DOL: DME (1:1, v/v)                      | 0.1C                           | 100    | 60.92%                 | 7         |
| Cu@PEO       | LFP     | 1 M LiTFSI + 2%LiNO <sub>3</sub> in DOL: DME (1:1, v/v)                      | 0.2C                           | 100    | 49.6%                  | 10        |
| Cu           | NCM622  | 2.3 M LiFSI and 4.6 M LiTFSI in DME                                          | C/3                            | 55     | ~55.62%                | 13        |
| Cu@GO        | NCM     | 1 M LiPF <sub>6</sub> in EC/DEC (1:1 v/v) with 5% FEC                        | 0.2 mA cm <sup>-2</sup>        | 20     | 46.32%                 | 14        |
| 3DLN         | LFP     | 1 M LiPF <sub>6</sub> in EC/DM (1:1, v/v)                                    | 0.5 mA cm <sup>-2</sup>        | 100    | 49.1%                  | 15        |
| Cu           | NCM111  | 2 M LiPF <sub>6</sub> in EC/DEC+50% FEC                                      | 0.2 mA cm <sup>-2</sup>        | 50     | 40%                    | 16        |
| Cu           | LFP     | 2 M LiFSI + 1 M LiTFSI in DOL/DME (1:1, v/v)                                 | 0.2 mA cm <sup>-2</sup>        | 100    | 33.3%                  | 17        |
| Cu           | LFP     | 4 M LiFSI in DME                                                             | 0.2 mA cm <sup>-2</sup>        | 50     | 52%                    | 18        |

87

88

89

90

91

92 **Reference**

93

- 94 (1) Lin, L.; Suo, L.; Hu, Y. sheng; Li, H.; Huang, X.; Chen, L. Epitaxial Induced Plating Current-Collector Lasting  
95 Lifespan of Anode-Free Lithium Metal Battery. *Adv. Energy Mater.* **2021**, *11* (9), 1–8.  
96 <https://doi.org/10.1002/aenm.202003709>.
- 97 (2) Luo, J.; Fang, C. C.; Wu, N. L. High Polarity Poly(Vinylidene Difluoride) Thin Coating for Dendrite-Free and  
98 High-Performance Lithium Metal Anodes. *Adv. Energy Mater.* **2018**, *8* (2), 1–7.  
99 <https://doi.org/10.1002/aenm.201701482>.
- 100 (3) Tamwattana, O.; Park, H.; Kim, J.; Hwang, I.; Yoon, G.; Hwang, T. H.; Kang, Y. S.; Park, J.; Meethong, N.; Kang,  
101 K. High-Dielectric Polymer Coating for Uniform Lithium Deposition in Anode-Free Lithium Batteries. *ACS*  
102 *Energy Lett.* **2021**, *6* (12), 4416–4425. <https://doi.org/10.1021/acsenergylett.1c02224>.
- 103 (4) Fu, A.; Wang, C.; Peng, J.; Su, M.; Pei, F.; Cui, J.; Fang, X.; Li, J. F.; Zheng, N. Lithiophilic and Antioxidative  
104 Copper Current Collectors for Highly Stable Lithium Metal Batteries. *Adv. Funct. Mater.* **2021**, *31* (15), 1–9.  
105 <https://doi.org/10.1002/adfm.202009805>.
- 106 (5) Lee, J. H.; Cho, Y. G.; Gu, D.; Kim, S. J. 2D PdTe<sub>2</sub>Thin-Film-Coated Current Collectors for Long-Cycling Anode-  
107 Free Rechargeable Batteries. *ACS Appl. Mater. Interfaces* **2022**, *14* (13), 15080–15089.  
108 <https://doi.org/10.1021/acsami.1c21183>.
- 109 (6) Wondimkun, Z. T.; Tegegne, W. A.; Shi-Kai, J.; Huang, C. J.; Sahalie, N. A.; Weret, M. A.; Hsu, J. Y.; Hsieh, P. L.;  
110 Huang, Y. S.; Wu, S. H.; Su, W. N.; Hwang, B. J. Highly-Lithiophilic Ag@PDA-GO Film to Suppress Dendrite  
111 Formation on Cu Substrate in Anode-Free Lithium Metal Batteries. *Energy Storage Mater.* **2021**, *35*, 334–344.  
112 <https://doi.org/10.1016/j.ensm.2020.11.023>.
- 113 (7) Assegie, A. A.; Chung, C. C.; Tsai, M. C.; Su, W. N.; Chen, C. W.; Hwang, B. J. Multilayer-Graphene-Stabilized  
114 Lithium Deposition for Anode-Free Lithium-Metal Batteries. *Nanoscale* **2019**, *11* (6), 2710–2720.  
115 <https://doi.org/10.1039/c8nr06980h>.
- 116 (8) Zhu, B.; Jin, Y.; Hu, X.; Zheng, Q.; Zhang, S.; Wang, Q.; Zhu, J. Poly(Dimethylsiloxane) Thin Film as a Stable  
117 Interfacial Layer for High-Performance Lithium-Metal Battery Anodes. *Adv. Mater.* **2017**, *29* (2), 1–6.  
118 <https://doi.org/10.1002/adma.201603755>.
- 119 (9) Liu, W.; Lin, D.; Pei, A.; Cui, Y. Stabilizing Lithium Metal Anodes by Uniform Li-Ion Flux Distribution in  
120 Nanochannel Confinement. *J. Am. Chem. Soc.* **2016**, *138* (47), 15443–15450.  
121 <https://doi.org/10.1021/jacs.6b08730>.
- 122 (10) Assegie, A. A.; Cheng, J. H.; Kuo, L. M.; Su, W. N.; Hwang, B. J. Polyethylene Oxide Film Coating Enhances  
123 Lithium Cycling Efficiency of an Anode-Free Lithium-Metal Battery. *Nanoscale* **2018**, *10* (13), 6125–6138.  
124 <https://doi.org/10.1039/c7nr09058g>.
- 125 (11) Zheng, G.; Wang, C.; Pei, A.; Lopez, J.; Shi, F.; Chen, Z.; Sendek, A. D.; Lee, W.; Lu, Z.; Schneider, H.; Safont-  
126 sempere, M. M.; Chu, S.; Bao, Z.; Cui, Y. High Performance Lithium Metal Negative Electrode with a Soft and  
127 Flowable Polymer Coating. *ACS Energy Lett* **2016**, *1* (6), 1247–1255.  
128 <https://doi.org/10.1021/acsenergylett.6b00456>.
- 129 (12) Liu, Y.; Lin, D.; Yuen, P. Y.; Liu, K.; Xie, J.; Dauskardt, R. H.; Cui, Y. An Artificial Solid Electrolyte Interphase  
130 with High Li-Ion Conductivity, Mechanical Strength, and Flexibility for Stable Lithium Metal Anodes. *Adv. Mater.*  
131 **2017**, *29* (10), 1–8. <https://doi.org/10.1002/adma.201605531>.
- 132 (13) Alvarado, J.; Schroeder, M. A.; Pollard, T. P.; Wang, X.; Lee, J. Z.; Zhang, M.; Wynn, T.; Ding, M.; Borodin, O.;  
133 Meng, Y. S.; Xu, K. Bisalt Ether Electrolytes: A Pathway towards Lithium Metal Batteries with Ni-Rich Cathodes.  
134 *Energy Environ. Sci.* **2019**, *12* (2), 780–794. <https://doi.org/10.1039/c8ee02601g>.
- 135 (14) Wondimkun, Z. T.; Beyene, T. T.; Weret, M. A.; Sahalie, N. A.; Huang, C. J.; Thirumalraj, B.; Jote, B. A.; Wang,

- 136 D.; Su, W. N.; Wang, C. H.; Brunklaus, G.; Winter, M.; Hwang, B. J. Binder-Free Ultra-Thin Graphene Oxide as  
137 an Artificial Solid Electrolyte Interphase for Anode-Free Rechargeable Lithium Metal Batteries. *J. Power Sources*  
138 **2020**, *450*, 227589. <https://doi.org/10.1016/j.jpowsour.2019.227589>.
- 139 (15) Liu, H.; Yue, X.; Xing, X.; Huang, J.; Petrova, V. Author ' s Accepted Manuscript A Scalable 3D Lithium Metal  
140 Anode. *Energy Storage Mater.* **2018**, *16*, 505–511. <https://doi.org/10.1016/j.ensm.2018.09.021>.
- 141 (16) Hagos, T. T.; Thirumalraj, B.; Huang, C.; Hadush, L.; Hagos, T. M.; Berhe, G. B.; Bezabh, K.; Cherng, J.; Chiu, S.;  
142 Su, W.; Hwang, B. Locally Concentrated LiPF<sub>6</sub> in Carbonate-Based Electrolyte with Fluoroethylene Carbonate as  
143 a Diluent for Anode-Free Lithium Metal Battery c Amita. *ACS Appl. Mater. Interfaces* **2019**, *11* (10), 9955–9963.  
144 <https://doi.org/10.1021/acsami.8b21052>.
- 145 (17) Beyene, T. T.; Bezabh, H. K.; Weret, M. A.; Hagos, T. M.; Huang, C.; Wang, C.; Su, W.; Dai, H.; Hwang, B.  
146 Concentrated Dual-Salt Electrolyte to Stabilize Li Metal and Increase Cycle Life of Anode Free Li-Metal Batteries.  
147 *J. Electrochem. Soc.* **2019**, *166* (8), 1501–1509. <https://doi.org/10.1149/2.0731908jes>.
- 148 (18) Rodriguez, R.; Loe, K. E.; Edison, R. A.; Stephens, R. M.; Dolocan, A.; Heller, A.; Mullins, C. B. Effect of the  
149 Electrolyte on the Cycling Efficiency of Lithium-Limited Cells and Their Morphology Studied Through in Situ  
150 Optical Imaging. *ACS Appl. Energy Mater.* **2018**, *1* (11), 5830–5835. <https://doi.org/10.1021/acsaem.8b01194>.
- 151
